# Supplementary material for: Boron-doped few-layer graphene nanosheet gas sensor for enhanced ammonia sensing at room temperature
Source: Royal Society of Chemistry journal article supplement (doi:10.1039/c9ra08707a), 2020-01-01
Supplement: c9ra08707a1.pdf [file c9ra08707a1.pdf]

## † Electronic Supplementary Information

### Boron-doped few-layer graphene nanosheet gas sensor for enhanced ammonia sensing at room temperature

Shubhda Srivastava,<sup>ab</sup> Shubhendra K. Jain,<sup>ab</sup> Govind Gupta,<sup>ab</sup> T. D. Senguttuvan<sup>\*ab</sup> and Bipin Kumar Gupta<sup>\*ab</sup>

<sup>a</sup>CSIR-National Physical Laboratory, Dr. K. S. Krishnan Road, New Delhi, 110012, India

<sup>b</sup>Academy of Scientific and Innovative Research (AcSIR), CSIR- National Physical Laboratory Campus, Dr. K. S. Krishnan Road, New Delhi 110012, India

\*Email: [tdsen@nplindia.org](mailto:tdsen@nplindia.org), [bipinbhu@yahoo.com](mailto:bipinbhu@yahoo.com)

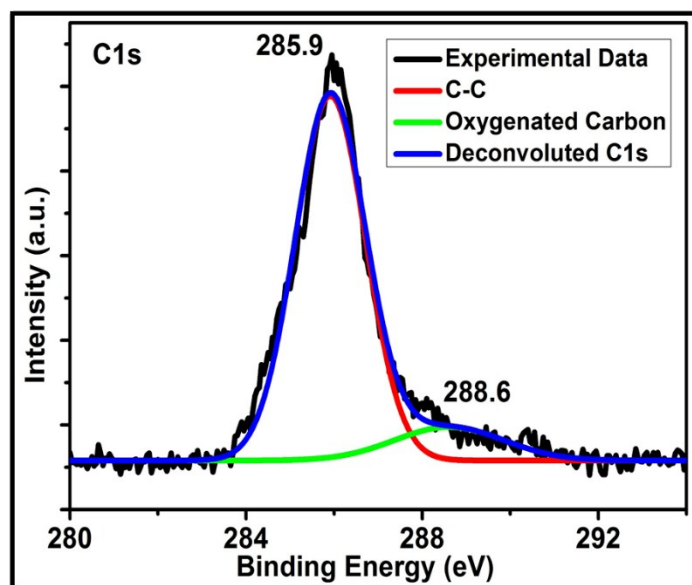

Figure S1. Deconvoluted C1s core level spectra of PFLGr nanosheets.

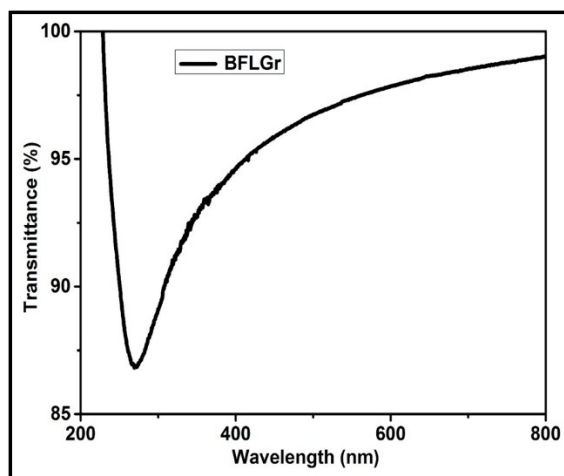

**Figure S2.** Transmittance spectra of BFLGr nanosheet.

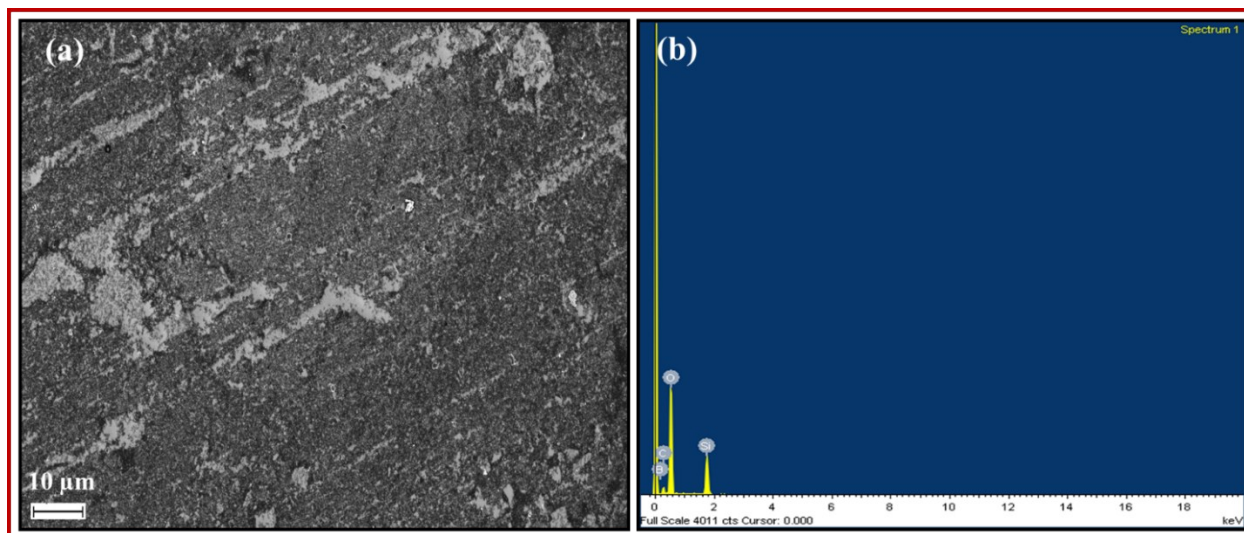

**Figure S3.** (a) FESEM image, and (b) EDX spectrum of small area of BFLGr nanosheet on Si/SiO<sub>2</sub> substrate.

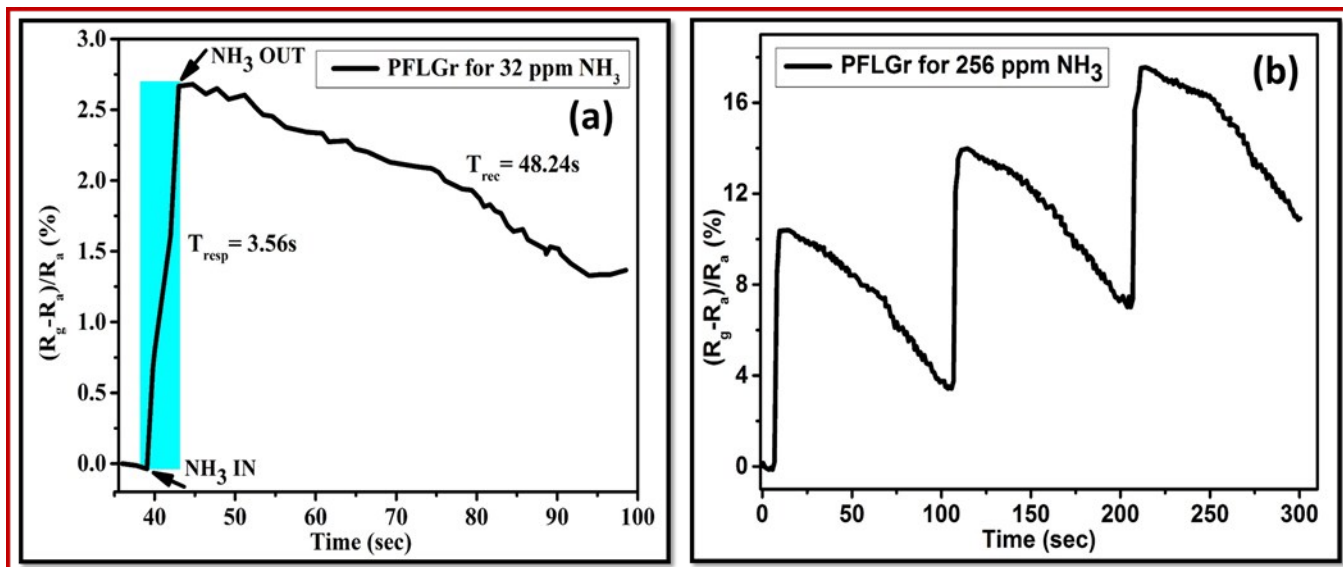

Figure S4. (a) Response –recovery cycle, and (b) Repeatability cycles of PFLGr sensor.

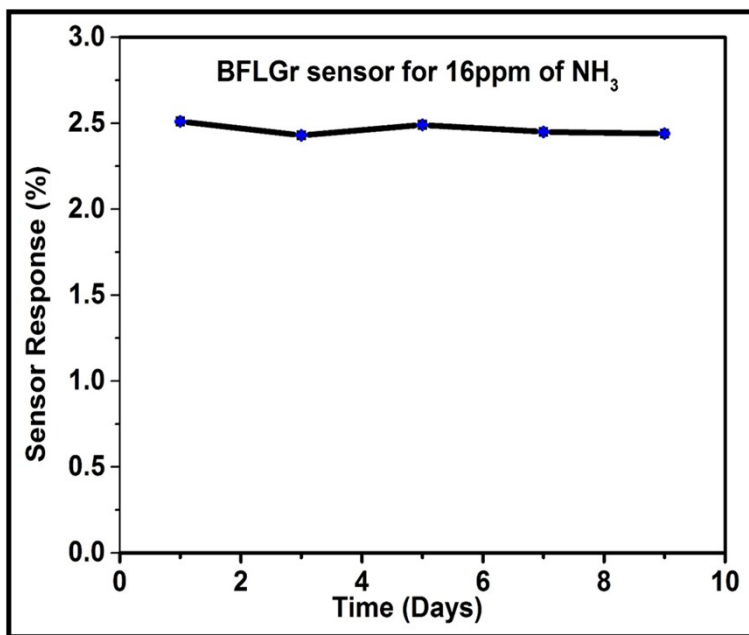

Figure S5. Stability study of BFLGr sensor with error bar for 16ppm of NH<sub>3</sub> as a function of time in days.

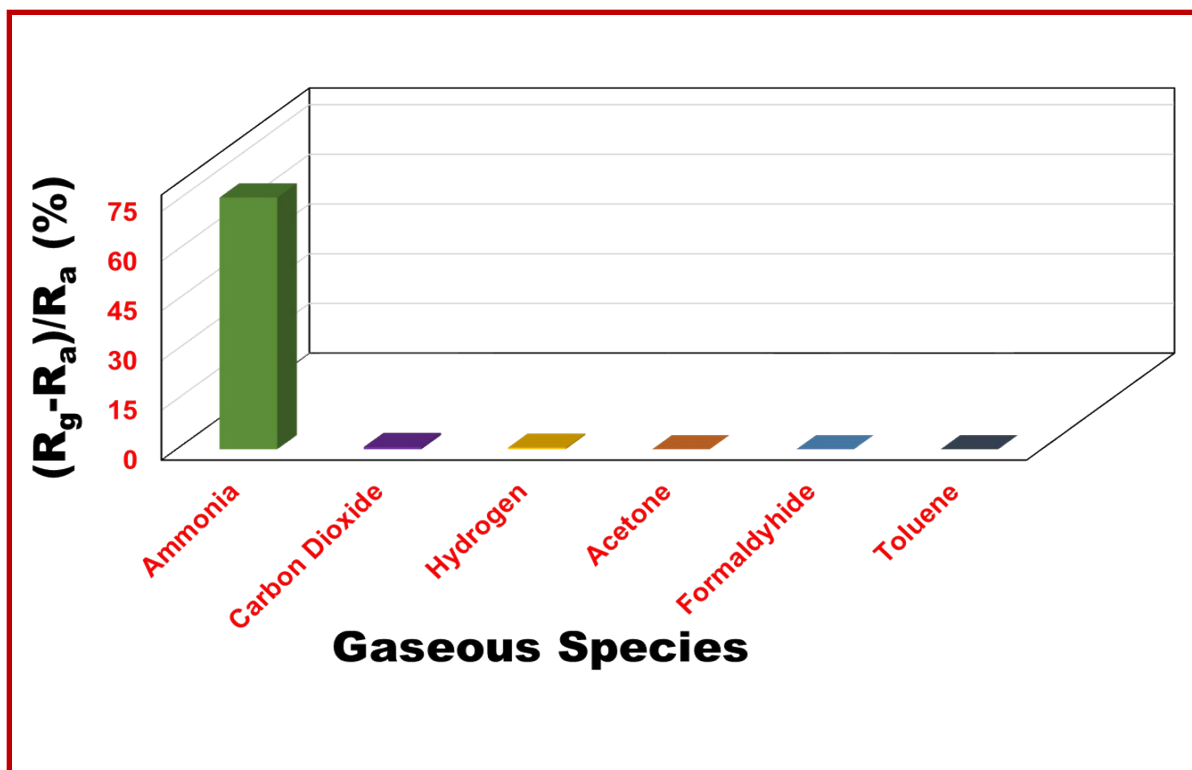

Figure S6. Selectivity plot of BFLGr sensor.

Table S1. Peak positions and intensity ratios of Raman spectra of PFLGr and BFLGr nanosheets.

| Sample | D Peak<br>( $\text{cm}^{-1}$ ) | G Peak<br>( $\text{cm}^{-1}$ ) | D' Peak<br>( $\text{cm}^{-1}$ ) | 2D Peak<br>( $\text{cm}^{-1}$ ) | $I_{2D}/I_G$ | $I_D/I_G$ | $I_D/I_{D'}$ |
|--------|--------------------------------|--------------------------------|---------------------------------|---------------------------------|--------------|-----------|--------------|
| PFLGr  | 1350                           | 1581                           | -                               | 2699                            | 0.91         | 0.69      | -            |
| BFLGr  | 1353                           | 1584                           | 1623                            | 2705                            | 0.88         | 0.84      | 1.25         |

**Table S2.** Performance table of Boron doped CVD graphene sensors for ammonia sensing.

| <b>Material</b>                                   | <b>Operating temperature (°C)</b> | <b>Concentration (ppm)</b> | <b>Response (%)</b>                               | <b>Response Time/Recovery Time (s/s)</b>            | <b>Reference</b> |
|---------------------------------------------------|-----------------------------------|----------------------------|---------------------------------------------------|-----------------------------------------------------|------------------|
| B-doped CVD Graphene                              | RT (In situ UV illumination)      | 1                          | 0.9<br>(estimated from graph published in paper ) | 200/-<br>(estimated from graph published in paper ) | 42               |
| B-doped Few layer Graphene                        | 65°C                              | 250                        | 30<br>(estimated from graph published in paper )  | 300/-<br>(estimated from graph published in paper ) | 43               |
| <b>Boron doped Few Layer CVD Graphene (BFLGr)</b> | <b>RT</b>                         | <b>16</b>                  | <b>2.6</b>                                        | <b>0.85/36.3</b>                                    | <b>This work</b> |
